# Supplementary material
Source: PubMed Central journal article supplement (PMC5539736)
Supplement: supp_WNL.0000000000004173_Supplement.pdf [file supp_WNL.0000000000004173_Supplement.pdf]

## ONLINE DATA SUPPLEMENT

### Type 2 Diabetes, Glucose, Insulin, BMI and Ischemic Stroke Subtypes: Mendelian Randomization Study

#### Contents

|                                                                                                                                                                                                                                                                    |            |
|--------------------------------------------------------------------------------------------------------------------------------------------------------------------------------------------------------------------------------------------------------------------|------------|
| <b>Table e-1.</b> Single nucleotide polymorphism used as instrumental variables in the Mendelian randomization analyses of type 2 diabetes, fasting glucose, fasting insulin, and body mass index .....                                                            | <b>2-7</b> |
| <b>Table e-2.</b> Mendelian randomization estimates of the associations between each genetically predicted risk factor and ischemic stroke and its subtypes in analyses using the inverse-variance weighted, weighted median, and MR-Egger regression methods..... | <b>8</b>   |
| <b>Table e-3.</b> Mendelian randomization estimates (inverse-variance weighted method) of the associations between each genetically predicted risk factor and ischemic stroke and its subtypes in sensitivity analyses excluding pleiotropic loci .....            | <b>9</b>   |

**Table e-1. Single nucleotide polymorphism used as instrumental variables in the Mendelian randomization analyses of type 2 diabetes, fasting glucose, fasting insulin, and body mass index**

| SNP        | Closest gene   | Risk factor | Risk factor |       | All ischemic strokes |        |         | Large artery stroke |        |         | Small vessel disease |        |         | Cardioembolic stroke |        |         | Excluded in SA |
|------------|----------------|-------------|-------------|-------|----------------------|--------|---------|---------------------|--------|---------|----------------------|--------|---------|----------------------|--------|---------|----------------|
|            |                |             | EA          | Beta  | Beta                 | SE     | P-value | Beta                | SE     | P-value | Beta                 | SE     | P-value | Beta                 | SE     | P-value |                |
| rs10203174 | THADA          | T2D         | C           | 0.131 | -0.0166              | 0.0257 | 0.5184  | 0.0972              | 0.0512 | 0.05786 | -0.0421              | 0.046  | 0.3602  | -0.0129              | 0.0445 | 0.7725  |                |
| rs10278336 | GCK            | T2D         | A           | 0.068 | -0.0004              | 0.0146 | 0.9775  | 0.0084              | 0.0298 | 0.7787  | 0.0021               | 0.0299 | 0.9449  | 0.0022               | 0.0265 | 0.9349  | Yes*           |
| rs10401969 | CILP2          | T2D         | C           | 0.122 | -0.0112              | 0.0276 | 0.6845  | 0.0155              | 0.0555 | 0.7798  | 0.0955               | 0.0543 | 0.07834 | -0.0504              | 0.0511 | 0.3243  | Yes†           |
| rs10811661 | CDKN2A/B       | T2D         | T           | 0.166 | 0.0041               | 0.0194 | 0.8339  | -0.0178             | 0.0391 | 0.6482  | 0.0503               | 0.0399 | 0.2082  | -0.0226              | 0.0347 | 0.5162  | Yes*           |
| rs10830963 | MTNR1B         | T2D         | G           | 0.095 | -0.0109              | 0.0172 | 0.5275  | 0.0874              | 0.0354 | 0.01362 | -0.0149              | 0.0353 | 0.6739  | -0.0102              | 0.0313 | 0.745   | Yes*           |
| rs10842994 | KLHDC5         | T2D         | C           | 0.095 | 0.0104               | 0.0183 | 0.5698  | 0.026               | 0.0382 | 0.4952  | -0.0515              | 0.0373 | 0.1669  | 0.0503               | 0.0339 | 0.1373  |                |
| rs10923931 | NOTCH2         | T2D         | T           | 0.077 | 0.037                | 0.0234 | 0.1148  | 0.121               | 0.0475 | 0.01086 | -0.0087              | 0.0486 | 0.8585  | 0.0689               | 0.0424 | 0.1041  |                |
| rs11063069 | CCND2          | T2D         | G           | 0.077 | -0.0002              | 0.0196 | 0.9935  | 0.0087              | 0.0411 | 0.8327  | 0.0539               | 0.0398 | 0.1758  | -0.0065              | 0.0357 | 0.8565  |                |
| rs1111875  | HHEX/IDE       | T2D         | C           | 0.104 | -0.0278              | 0.0146 | 0.05692 | 0.0006              | 0.0298 | 0.9847  | -0.024               | 0.0301 | 0.4259  | -0.0348              | 0.0265 | 0.1892  |                |
| rs11257655 | CDC123/CAMK1D  | T2D         | T           | 0.068 | -0.0007              | 0.0182 | 0.968   | -0.0479             | 0.0388 | 0.2173  | 0.0248               | 0.0378 | 0.5109  | -0.0162              | 0.033  | 0.6237  |                |
| rs11634397 | ZFAND6         | T2D         | G           | 0.049 | 0.0223               | 0.0153 | 0.1452  | 0.0006              | 0.0309 | 0.9851  | -0.0022              | 0.031  | 0.9436  | 0.0227               | 0.0278 | 0.4147  |                |
| rs11717195 | ADCY5          | T2D         | T           | 0.104 | 0.0222               | 0.0173 | 0.1978  | 0.0238              | 0.0353 | 0.4999  | 0.0152               | 0.0355 | 0.6683  | 0.0521               | 0.0319 | 0.1025  | Yes*           |
| rs12427353 | HNF1A (TCF1)   | T2D         | G           | 0.077 | -0.0001              | 0.0184 | 0.9971  | 0.0044              | 0.0378 | 0.9081  | 0.007                | 0.0378 | 0.8536  | 0.0035               | 0.0335 | 0.9158  |                |
| rs12571751 | ZMIZ1          | T2D         | A           | 0.077 | 0.0119               | 0.0144 | 0.4083  | 0.0288              | 0.0295 | 0.3282  | 0.0505               | 0.0297 | 0.08915 | -0.0204              | 0.0261 | 0.4359  |                |
| rs12899811 | PRC1           | T2D         | G           | 0.077 | 0.0008               | 0.0157 | 0.9599  | 0.0262              | 0.0313 | 0.4016  | 0.0368               | 0.0315 | 0.243   | 0.0216               | 0.0279 | 0.4395  |                |
| rs12970134 | MC4R           | T2D         | A           | 0.077 | 0.019                | 0.0168 | 0.2567  | -0.0016             | 0.0356 | 0.9636  | -0.0095              | 0.0356 | 0.7891  | 0.0727               | 0.0303 | 0.01662 | Yes*           |
| rs13233731 | KLF14          | T2D         | G           | 0.049 | 0.0012               | 0.0143 | 0.9335  | -0.0018             | 0.029  | 0.9493  | 0.0344               | 0.0293 | 0.2411  | 0.018                | 0.0259 | 0.4867  | Yes†           |
| rs13389219 | GRB14          | T2D         | C           | 0.068 | 0.0001               | 0.0147 | 0.9922  | 0.0393              | 0.03   | 0.1901  | 0.0277               | 0.0302 | 0.3581  | -0.0136              | 0.0266 | 0.6087  | Yes*†          |
| rs1359790  | SPRY2          | T2D         | G           | 0.077 | 0.0214               | 0.0162 | 0.1868  | 0.0036              | 0.033  | 0.9132  | -0.03                | 0.033  | 0.3636  | 0.0335               | 0.0295 | 0.2565  |                |
| rs1496653  | UBE2E2         | T2D         | A           | 0.086 | 0.0031               | 0.018  | 0.8618  | -0.0247             | 0.036  | 0.4935  | 0.0124               | 0.0369 | 0.7373  | -0.0197              | 0.0326 | 0.5456  |                |
| rs1552224  | ARAP1 (CENTD2) | T2D         | A           | 0.104 | 0.0131               | 0.0219 | 0.5496  | -0.002              | 0.0451 | 0.9638  | -0.0456              | 0.0452 | 0.3136  | 0.0094               | 0.0395 | 0.8124  | Yes*           |
| rs163184   | KCNQ1          | T2D         | G           | 0.086 | 0.0273               | 0.0145 | 0.05955 | 0.0219              | 0.0299 | 0.4652  | 0.0309               | 0.0297 | 0.2985  | 0.026                | 0.0265 | 0.3269  |                |
| rs17168486 | DGKB           | T2D         | T           | 0.104 | -0.002               | 0.0191 | 0.9155  | -0.0101             | 0.0392 | 0.797   | 0.0157               | 0.0394 | 0.6908  | 0.0287               | 0.0347 | 0.4075  | Yes*           |
| rs17791513 | TLE4           | T2D         | A           | 0.113 | 0.0465               | 0.0308 | 0.1314  | 0.0765              | 0.0654 | 0.242   | 0.0587               | 0.0637 | 0.3562  | -0.0417              | 0.0547 | 0.4454  |                |
| rs1801282  | PPARG          | T2D         | C           | 0.122 | 0.0249               | 0.0216 | 0.2496  | -0.047              | 0.0432 | 0.2765  | 0.0077               | 0.0448 | 0.8632  | 0.0426               | 0.0394 | 0.2793  | Yes*           |
| rs2075423  | PROX1          | T2D         | G           | 0.068 | 0.0064               | 0.0151 | 0.6706  | -0.0046             | 0.0308 | 0.8803  | 0.0023               | 0.0311 | 0.942   | -0.0308              | 0.0275 | 0.2622  | Yes*           |
| rs2261181  | HMGGA2         | T2D         | T           | 0.122 | -0.006               | 0.0236 | 0.7995  | 0.0605              | 0.0474 | 0.2017  | 0.064                | 0.0474 | 0.177   | -0.0422              | 0.043  | 0.3266  |                |
| rs2334499  | HCCA2          | T2D         | T           | 0.039 | 0.0068               | 0.015  | 0.651   | 0.0695              | 0.0313 | 0.02638 | 0.0344               | 0.0307 | 0.2617  | -0.0202              | 0.0278 | 0.4672  |                |

|            |                        |         |   |       |         |        |           |         |        |           |         |        |         |         |        |          |       |
|------------|------------------------|---------|---|-------|---------|--------|-----------|---------|--------|-----------|---------|--------|---------|---------|--------|----------|-------|
| rs243088   | <i>BCL11A</i>          | T2D     | T | 0.068 | 0.0096  | 0.0144 | 0.5051    | 0.0179  | 0.0292 | 0.54      | 0.0173  | 0.0296 | 0.5592  | 0.0217  | 0.0261 | 0.405    |       |
| rs2796441  | <i>TLE1</i>            | T2D     | G | 0.068 | 0.0057  | 0.015  | 0.7044    | -0.0011 | 0.0308 | 0.9704    | 0.0211  | 0.0308 | 0.4935  | -0.0117 | 0.0274 | 0.6695   |       |
| rs2943640  | <i>IRS1</i>            | T2D     | C | 0.095 | 0.0083  | 0.015  | 0.5783    | 0.0341  | 0.0309 | 0.2697    | 0.0561  | 0.0311 | 0.0711  | -0.0185 | 0.0272 | 0.4956   | Yes*† |
| rs3802177  | <i>SLC30A8</i>         | T2D     | G | 0.131 | 0.0273  | 0.0156 | 0.08044   | 0.0696  | 0.032  | 0.02967   | 0.0143  | 0.032  | 0.6539  | 0.0115  | 0.0282 | 0.683    | Yes*  |
| rs4402960  | <i>IGF2BP2</i>         | T2D     | T | 0.122 | 0.0238  | 0.0154 | 0.1216    | 0.0437  | 0.0314 | 0.1639    | 0.0542  | 0.0315 | 0.08562 | 0.0259  | 0.0279 | 0.3532   | Yes*  |
| rs4430796  | <i>HNF1B (TCF2)</i>    | T2D     | G | 0.122 | -0.0033 | 0.0144 | 0.8191    | 0.0194  | 0.0292 | 0.5068    | 0.0002  | 0.0295 | 0.9953  | -0.0138 | 0.0261 | 0.598    |       |
| rs4458523  | <i>WFS1</i>            | T2D     | G | 0.095 | 0.0022  | 0.0146 | 0.8799    | 0.0006  | 0.0299 | 0.9846    | 0.0053  | 0.03   | 0.861   | 0.0325  | 0.0267 | 0.2234   |       |
| rs459193   | <i>ANKRD55</i>         | T2D     | G | 0.077 | -0.0085 | 0.0166 | 0.6105    | 0.0037  | 0.0338 | 0.9131    | -0.0194 | 0.0342 | 0.5709  | -0.0092 | 0.0301 | 0.7591   | Yes*† |
| rs516946   | <i>ANK1</i>            | T2D     | C | 0.086 | 0.0019  | 0.0168 | 0.9095    | -0.0256 | 0.0338 | 0.4485    | 0.073   | 0.0347 | 0.03536 | -0.0303 | 0.0302 | 0.3155   |       |
| rs5215     | <i>KCNJ11</i>          | T2D     | C | 0.068 | 0.0576  | 0.0149 | 0.0001067 | 0.0204  | 0.0303 | 0.5011    | 0.0872  | 0.0303 | 0.00395 | 0.0796  | 0.0268 | 0.003012 |       |
| rs6795735  | <i>ADAMTS9</i>         | T2D     | C | 0.077 | 0.0469  | 0.0146 | 0.001325  | 0.0823  | 0.0297 | 0.005632  | 0.0358  | 0.0299 | 0.2316  | 0.0468  | 0.0264 | 0.07636  |       |
| rs6878122  | <i>ZBED3</i>           | T2D     | G | 0.095 | 0.0446  | 0.0157 | 0.004615  | 0.0295  | 0.0321 | 0.3589    | 0.0757  | 0.0321 | 0.01816 | 0.0035  | 0.0289 | 0.9036   | Yes*  |
| rs7177055  | <i>HMG20A</i>          | T2D     | A | 0.077 | 0.0125  | 0.0158 | 0.4302    | 0.0295  | 0.0319 | 0.3546    | -0.0136 | 0.0323 | 0.6724  | 0.0182  | 0.0284 | 0.5211   |       |
| rs7202877  | <i>BCAR1</i>           | T2D     | T | 0.113 | 0.0098  | 0.0241 | 0.6859    | -0.0127 | 0.0492 | 0.7962    | -0.069  | 0.0483 | 0.1532  | -0.0131 | 0.0436 | 0.7633   |       |
| rs7756992  | <i>CDKAL1</i>          | T2D     | G | 0.157 | 0.0044  | 0.0159 | 0.7819    | 0.0194  | 0.0323 | 0.5478    | 0.022   | 0.0326 | 0.4988  | -0.0085 | 0.029  | 0.768    | Yes*  |
| rs780094   | <i>GCKR</i>            | T2D     | C | 0.058 | -0.006  | 0.0166 | 0.7172    | -0.0323 | 0.0322 | 0.3156    | -0.0075 | 0.0299 | 0.8018  | 0.0003  | 0.0288 | 0.9919   | Yes*† |
| rs7845219  | <i>TP53INP1</i>        | T2D     | T | 0.058 | 0.002   | 0.0143 | 0.8881    | 0.0222  | 0.0292 | 0.4464    | 0.025   | 0.0295 | 0.3959  | -0.0183 | 0.026  | 0.4823   |       |
| rs7903146  | <i>TCF7L2</i>          | T2D     | T | 0.329 | 0.0427  | 0.018  | 0.01736   | 0.1069  | 0.0346 | 0.001981  | 0.0621  | 0.0374 | 0.09669 | 0.0323  | 0.0313 | 0.3022   | Yes*  |
| rs7955901  | <i>TSPAN8/LGR5</i>     | T2D     | C | 0.068 | 0.0218  | 0.0143 | 0.1278    | 0.122   | 0.0292 | 0.0000292 | 0.0208  | 0.0294 | 0.478   | -0.0021 | 0.0261 | 0.9358   |       |
| rs8108269  | <i>GIPR</i>            | T2D     | G | 0.068 | 0.0133  | 0.0157 | 0.3974    | 0.0312  | 0.0324 | 0.3359    | -0.0202 | 0.0324 | 0.5327  | 0.0101  | 0.0286 | 0.7233   | Yes*† |
| rs849135   | <i>JAZF1</i>           | T2D     | G | 0.104 | 0.0095  | 0.0144 | 0.5116    | -0.0005 | 0.0292 | 0.9851    | 0.0379  | 0.0294 | 0.1973  | -0.0189 | 0.0261 | 0.4685   |       |
| rs10747083 | <i>P2RX2</i>           | Glucose | A | 0.013 | 0.0255  | 0.0166 | 0.124     | 0.0038  | 0.0332 | 0.9079    | 0.0451  | 0.0331 | 0.172   | -0.0133 | 0.0298 | 0.6555   |       |
| rs10811661 | <i>CDKN2B</i>          | Glucose | T | 0.024 | 0.0041  | 0.0194 | 0.8339    | -0.0178 | 0.0391 | 0.6482    | 0.0503  | 0.0399 | 0.2082  | -0.0226 | 0.0347 | 0.5162   | Yes*  |
| rs10830963 | <i>MTNR1B</i>          | Glucose | G | 0.078 | -0.0109 | 0.0172 | 0.5275    | 0.0874  | 0.0354 | 0.01362   | -0.0149 | 0.0353 | 0.6739  | -0.0102 | 0.0313 | 0.745    | Yes*  |
| rs10885122 | <i>ADRA2A</i>          | Glucose | G | 0.027 | 0.0187  | 0.0219 | 0.3919    | -0.051  | 0.0436 | 0.2418    | 0.0192  | 0.0453 | 0.6718  | 0.0101  | 0.0394 | 0.7984   |       |
| rs11071657 | <i>VPS13C/C2CD4A/B</i> | Glucose | A | 0.010 | -0.0232 | 0.015  | 0.1213    | -0.0613 | 0.0305 | 0.04444   | -0.0232 | 0.0306 | 0.4483  | -0.0216 | 0.0274 | 0.4305   |       |
| rs11558471 | <i>SLC30A8</i>         | Glucose | A | 0.029 | 0.0258  | 0.0156 | 0.09795   | 0.0711  | 0.0319 | 0.02601   | 0.0122  | 0.0319 | 0.7022  | 0.0099  | 0.0281 | 0.7253   | Yes*  |
| rs11603334 | <i>ARAP1</i>           | Glucose | G | 0.019 | 0.0127  | 0.0219 | 0.5609    | -0.0022 | 0.0451 | 0.9619    | -0.0475 | 0.0452 | 0.2931  | 0.0094  | 0.0395 | 0.8124   | Yes*  |
| rs11605924 | <i>CRY2</i>            | Glucose | A | 0.020 | -0.0118 | 0.0144 | 0.4122    | -0.0272 | 0.0294 | 0.3542    | -0.025  | 0.0294 | 0.396   | 0.0153  | 0.0262 | 0.5608   |       |
| rs11619319 | <i>PDX1</i>            | Glucose | G | 0.019 | 0.0017  | 0.0171 | 0.9202    | 0.0317  | 0.0346 | 0.3588    | 0.0268  | 0.0348 | 0.4402  | -0.0391 | 0.0313 | 0.212    |       |
| rs11708067 | <i>ADCY5</i>           | Glucose | A | 0.023 | 0.0293  | 0.0174 | 0.09226   | 0.0378  | 0.0356 | 0.2878    | 0.0174  | 0.0357 | 0.626   | 0.0585  | 0.0321 | 0.06831  | Yes*  |
| rs11715915 | <i>AMT</i>             | Glucose | C | 0.012 | 0.0247  | 0.0181 | 0.1705    | 0.0143  | 0.0353 | 0.6852    | 0.0545  | 0.0382 | 0.1536  | 0.0391  | 0.0315 | 0.2149   |       |
| rs11920090 | <i>SLC2A2</i>          | Glucose | T | 0.026 | -0.0006 | 0.021  | 0.9763    | 0.0341  | 0.0428 | 0.4251    | -0.0093 | 0.0431 | 0.8283  | -0.0582 | 0.0374 | 0.12     |       |

|            |                       |         |   |        |         |        |          |         |        |          |         |        |         |         |        |         |       |
|------------|-----------------------|---------|---|--------|---------|--------|----------|---------|--------|----------|---------|--------|---------|---------|--------|---------|-------|
| rs16913693 | <i>IKBKAP</i>         | Glucose | T | 0.043  | -0.0222 | 0.0457 | 0.6266   | -0.0015 | 0.0966 | 0.9875   | -0.0075 | 0.0995 | 0.9399  | -0.0804 | 0.0825 | 0.3295  |       |
| rs174550   | <i>FADS1</i>          | Glucose | T | 0.019  | 0.0226  | 0.0153 | 0.1394   | 0.0856  | 0.0315 | 0.006654 | -0.0504 | 0.0314 | 0.1082  | 0.0453  | 0.028  | 0.1055  | Yes†  |
| rs17762454 | <i>RREB1</i>          | Glucose | T | 0.014† | -0.0022 | 0.0163 | 0.8942   | -0.0203 | 0.0335 | 0.5453   | -0.0048 | 0.0336 | 0.8873  | 0.011   | 0.0295 | 0.7086  |       |
| rs2191349  | <i>DGKB/TMEM195</i>   | Glucose | T | 0.029  | 0.0118  | 0.0144 | 0.4161   | 0.0411  | 0.0296 | 0.1653   | -0.0175 | 0.0297 | 0.5562  | 0.0251  | 0.0264 | 0.3403  | Yes*  |
| rs2302593  | <i>GIPR</i>           | Glucose | C | 0.014  | -0.0099 | 0.0146 | 0.5001   | 0.0132  | 0.0301 | 0.6623   | -0.0398 | 0.0299 | 0.1831  | -0.0068 | 0.0268 | 0.7981  | Yes†  |
| rs2657879  | <i>GLS2</i>           | Glucose | G | 0.016† | -0.0019 | 0.0186 | 0.9193   | -0.0038 | 0.0377 | 0.919    | 0.016   | 0.0381 | 0.675   | -0.0421 | 0.0339 | 0.2143  |       |
| rs340874   | <i>PROX1</i>          | Glucose | C | 0.013  | -0.0136 | 0.0144 | 0.3465   | -0.0274 | 0.0293 | 0.3505   | -0.0039 | 0.0296 | 0.8946  | -0.0262 | 0.0262 | 0.3178  | Yes*  |
| rs3783347  | <i>WARS</i>           | Glucose | G | 0.017  | 0.0445  | 0.0177 | 0.01189  | 0.0398  | 0.0359 | 0.268    | 0.0528  | 0.0366 | 0.1488  | -0.0086 | 0.0319 | 0.7884  |       |
| rs3829109  | <i>LOC728489</i>      | Glucose | G | 0.017  | 0.046   | 0.0174 | 0.008364 | 0.0704  | 0.0349 | 0.04369  | 0.0607  | 0.0358 | 0.08986 | 0.0809  | 0.0316 | 0.01053 |       |
| rs4506565  | <i>TCF7L2</i>         | Glucose | T | 0.021  | 0.0445  | 0.0176 | 0.01145  | 0.0917  | 0.0339 | 0.006898 | 0.0828  | 0.0366 | 0.02351 | 0.0179  | 0.0306 | 0.5595  | Yes*  |
| rs4607517  | <i>GCK</i>            | Glucose | A | 0.057  | 0.0063  | 0.0194 | 0.7445   | 0.0342  | 0.038  | 0.3683   | 0.0154  | 0.0388 | 0.691   | -0.0358 | 0.0349 | 0.3053  | Yes*  |
| rs4869272  | <i>PCSK1</i>          | Glucose | T | 0.018  | -0.001  | 0.0154 | 0.947    | 0.0088  | 0.0313 | 0.7789   | -0.0327 | 0.0318 | 0.3038  | 0.0347  | 0.0282 | 0.2193  |       |
| rs560887   | <i>G6PC2</i>          | Glucose | C | 0.071  | -0.0192 | 0.0156 | 0.2209   | -0.0403 | 0.0317 | 0.2031   | -0.0415 | 0.032  | 0.1948  | -0.0176 | 0.0285 | 0.5369  |       |
| rs576674   | <i>KL</i>             | Glucose | G | 0.017  | 0.0469  | 0.0189 | 0.01305  | -0.0018 | 0.0386 | 0.9618   | 0.088   | 0.0383 | 0.02148 | 0.0327  | 0.0342 | 0.3396  |       |
| rs6072275  | <i>TOP1</i>           | Glucose | A | 0.016  | 0.0151  | 0.02   | 0.4497   | 0.1063  | 0.0403 | 0.00844  | -0.0105 | 0.0412 | 0.799   | 0.0175  | 0.0363 | 0.6289  |       |
| rs6113722  | <i>FOXA2</i>          | Glucose | G | 0.035  | -0.0199 | 0.037  | 0.5897   | -0.0388 | 0.0761 | 0.6101   | 0.132   | 0.08   | 0.09872 | -0.0783 | 0.0652 | 0.2303  |       |
| rs6943153  | <i>GRB10</i>          | Glucose | T | 0.015  | -0.0091 | 0.0156 | 0.5587   | 0.0046  | 0.0318 | 0.8841   | -0.0436 | 0.0319 | 0.1719  | -0.04   | 0.0285 | 0.161   |       |
| rs7651090  | <i>IGF2BP2</i>        | Glucose | G | 0.013  | 0.0256  | 0.0154 | 0.09565  | 0.0465  | 0.0313 | 0.1374   | 0.0665  | 0.0315 | 0.03507 | 0.028   | 0.0279 | 0.3157  | Yes*  |
| rs7708285  | <i>ZBED3</i>          | Glucose | G | 0.015† | 0.0417  | 0.0159 | 0.008766 | 0.0422  | 0.0325 | 0.1936   | 0.0678  | 0.0324 | 0.03615 | -0.0047 | 0.0292 | 0.8723  | Yes*  |
| rs780094   | <i>GCKR</i>           | Glucose | C | 0.027  | -0.006  | 0.0166 | 0.7172   | -0.0323 | 0.0322 | 0.3156   | -0.0075 | 0.0299 | 0.8018  | 0.0003  | 0.0288 | 0.9919  | Yes*† |
| rs7867224  | <i>GLIS3</i>          | Glucose | A | 0.013  | 0.0172  | 0.0143 | 0.2301   | 0.0273  | 0.0291 | 0.348    | 0.0566  | 0.0295 | 0.05489 | 0.0076  | 0.026  | 0.7694  |       |
| rs7944584  | <i>MADD</i>           | Glucose | A | 0.023  | -0.0052 | 0.016  | 0.7458   | -0.0572 | 0.0323 | 0.07656  | 0.0254  | 0.033  | 0.442   | 0.0367  | 0.0291 | 0.2078  |       |
| rs9368222  | <i>CDKAL1</i>         | Glucose | A | 0.014  | 0.0034  | 0.016  | 0.8323   | 0.0161  | 0.0324 | 0.6208   | 0.0181  | 0.0329 | 0.5823  | -0.013  | 0.0292 | 0.6572  | Yes*  |
| rs983309   | <i>PPP1R3B</i>        | Glucose | T | 0.026  | 0.0269  | 0.0231 | 0.2431   | 0.001   | 0.0474 | 0.9839   | 0.0103  | 0.0481 | 0.8299  | 0.0595  | 0.042  | 0.1568  | Yes*† |
| rs10195252 | <i>GRB14</i>          | Insulin | T | 0.016  | -0.0048 | 0.0146 | 0.7415   | 0.034   | 0.0298 | 0.254    | 0.024   | 0.0299 | 0.4214  | -0.0208 | 0.0264 | 0.4317  | Yes*† |
| rs1167800  | <i>HIP1</i>           | Insulin | A | 0.016  | 0.037   | 0.0147 | 0.01215  | 0.0623  | 0.0305 | 0.04098  | 0.0484  | 0.0303 | 0.1106  | -0.0251 | 0.0269 | 0.352   | Yes*  |
| rs1530559  | <i>YSK4</i>           | Insulin | A | 0.015  | -0.0046 | 0.0165 | 0.7808   | -0.0217 | 0.0335 | 0.5172   | -0.0226 | 0.0337 | 0.5014  | -0.0224 | 0.0296 | 0.4495  |       |
| rs17036328 | <i>PPARG</i>          | Insulin | T | 0.021† | 0.0193  | 0.0215 | 0.368    | -0.0398 | 0.0428 | 0.3519   | -0.0074 | 0.0446 | 0.8687  | 0.0527  | 0.0391 | 0.1776  | Yes*  |
| rs2126259  | <i>PPP1R3B</i>        | Insulin | T | 0.024† | 0.015   | 0.0245 | 0.5404   | 0.0246  | 0.0496 | 0.6195   | -0.0051 | 0.051  | 0.9198  | 0.047   | 0.0446 | 0.2921  | Yes*  |
| rs2745353  | <i>RSPO3</i>          | Insulin | T | 0.014  | 0.0091  | 0.0143 | 0.5216   | 0.0266  | 0.029  | 0.3599   | -0.0289 | 0.0292 | 0.3219  | 0.0163  | 0.0259 | 0.5275  | Yes†  |
| rs2943645  | <i>IRS1</i>           | Insulin | T | 0.019  | 0.0031  | 0.0149 | 0.8374   | 0.0333  | 0.0306 | 0.2764   | 0.0097  | 0.0308 | 0.7522  | -0.0103 | 0.027  | 0.7041  | Yes*† |
| rs3822072  | <i>FAM13A1</i>        | Insulin | A | 0.012† | 0.0337  | 0.0146 | 0.02066  | 0.093   | 0.0297 | 0.00176  | 0.0266  | 0.0298 | 0.3735  | 0.0231  | 0.0264 | 0.3829  | Yes†  |
| rs459193   | <i>ANKRD55-MAP3KI</i> | Insulin | G | 0.015† | -0.0085 | 0.0166 | 0.6105   | 0.0037  | 0.0338 | 0.9131   | -0.0194 | 0.0342 | 0.5709  | -0.0092 | 0.0301 | 0.7591  | Yes*† |

|            |                    |         |   |        |         |        |          |         |        |          |         |        |          |         |        |          |      |
|------------|--------------------|---------|---|--------|---------|--------|----------|---------|--------|----------|---------|--------|----------|---------|--------|----------|------|
| rs4846565  | <i>LYPLAL1</i>     | Insulin | G | 0.013# | -0.0268 | 0.0153 | 0.07993  | -0.014  | 0.0311 | 0.6533   | -0.034  | 0.0313 | 0.2768   | -0.0283 | 0.0278 | 0.3077   |      |
| rs4865796  | <i>ARL15</i>       | Insulin | A | 0.015  | 0.01    | 0.0156 | 0.5232   | 0.0347  | 0.0322 | 0.2813   | 0.0442  | 0.0322 | 0.17     | -0.03   | 0.0284 | 0.2916   |      |
| rs6822892  | <i>PDGFC</i>       | Insulin | A | 0.014# | 0.0168  | 0.0153 | 0.272    | 0.0143  | 0.0328 | 0.6623   | 0.005   | 0.0311 | 0.8721   | 0.0183  | 0.0277 | 0.5088   |      |
| rs6912327  | <i>C6orf107</i>    | Insulin | T | 0.017  | -0.0381 | 0.0171 | 0.02551  | -0.1032 | 0.0343 | 0.002658 | 0.0328  | 0.0351 | 0.3492   | 0.0175  | 0.031  | 0.572    |      |
| rs731839   | <i>PEPD</i>        | Insulin | G | 0.015  | 0.0256  | 0.0153 | 0.094    | 0.0829  | 0.0307 | 0.00697  | 0.0519  | 0.0313 | 0.09716  | 0.0354  | 0.0276 | 0.2003   | Yes† |
| rs780094   | <i>GCKR</i>        | Insulin | C | 0.019  | -0.006  | 0.0166 | 0.7172   | -0.0323 | 0.0322 | 0.3156   | -0.0075 | 0.0299 | 0.8018   | 0.0003  | 0.0288 | 0.9919   | Yes† |
| rs7903146  | <i>TCF7L2</i>      | Insulin | C | 0.018  | -0.0427 | 0.018  | 0.01736  | -0.1069 | 0.0346 | 0.001981 | -0.0621 | 0.0374 | 0.09669  | -0.0323 | 0.0313 | 0.3022   | Yes* |
| rs860598   | <i>IGF1</i>        | Insulin | A | 0.018  | -0.0064 | 0.0191 | 0.7364   | 0.0729  | 0.0398 | 0.06681  | 0.0355  | 0.0395 | 0.3688   | -0.0995 | 0.0343 | 0.003754 | Yes* |
| rs974801   | <i>TET2</i>        | Insulin | G | 0.014# | -0.0219 | 0.0148 | 0.1408   | -0.0036 | 0.03   | 0.9036   | -0.0444 | 0.0305 | 0.1451   | -0.0025 | 0.0268 | 0.9258   |      |
| rs1000940  | <i>RABEP1</i>      | BMI     | G | 0.019  | -0.0098 | 0.0155 | 0.53     | -0.0004 | 0.0315 | 0.9905   | -0.0224 | 0.0319 | 0.4823   | 0.0201  | 0.0281 | 0.4746   |      |
| rs10132280 | <i>STXBP6</i>      | BMI     | C | 0.023  | 0.0099  | 0.0157 | 0.5283   | 0.0513  | 0.0322 | 0.111    | -0.0397 | 0.032  | 0.2142   | 0.027   | 0.0284 | 0.3413   |      |
| rs1016287  | <i>LINC01122</i>   | BMI     | T | 0.023  | 0.0116  | 0.0158 | 0.4598   | -0.0205 | 0.0322 | 0.524    | 0.0016  | 0.0324 | 0.9596   | 0.0254  | 0.0286 | 0.3755   |      |
| rs10182181 | <i>ADCY3</i>       | BMI     | G | 0.031  | -0.0063 | 0.0163 | 0.6967   | -0.0268 | 0.0314 | 0.3937   | -0.0268 | 0.0294 | 0.3615   | -0.0833 | 0.0283 | 0.003211 |      |
| rs10733682 | <i>LMX1B</i>       | BMI     | A | 0.017  | -0.0164 | 0.0143 | 0.2507   | 0.003   | 0.0289 | 0.9177   | -0.0164 | 0.0293 | 0.5765   | -0.0185 | 0.0259 | 0.4757   |      |
| rs10938397 | <i>GNPDA2</i>      | BMI     | G | 0.040  | 0.0121  | 0.0146 | 0.4072   | 0.0382  | 0.0302 | 0.2057   | 0.0627  | 0.03   | 0.03648  | -0.0131 | 0.0268 | 0.6245   |      |
| rs10968576 | <i>LINGO2</i>      | BMI     | G | 0.025  | -0.0077 | 0.0155 | 0.6184   | -0.0265 | 0.0316 | 0.4021   | 0.0135  | 0.032  | 0.672    | -0.0036 | 0.0282 | 0.8987   |      |
| rs11030104 | <i>BDNF</i>        | BMI     | A | 0.041  | 0.0392  | 0.018  | 0.0291   | 0.0442  | 0.0377 | 0.2402   | 0.0415  | 0.038  | 0.2753   | 0.0405  | 0.0324 | 0.2115   | Yes§ |
| rs11057405 | <i>CLIP1</i>       | BMI     | G | 0.031  | -0.078  | 0.0246 | 0.001504 | -0.0871 | 0.0498 | 0.0805   | -0.1698 | 0.0501 | 0.000702 | -0.0807 | 0.0445 | 0.06991  |      |
| rs11126666 | <i>KCNK3</i>       | BMI     | A | 0.021  | 0.0322  | 0.0184 | 0.07986  | 0.0861  | 0.0351 | 0.01415  | -0.0054 | 0.0336 | 0.8725   | 0.0223  | 0.0319 | 0.4848   |      |
| rs11165643 | <i>PTBP2</i>       | BMI     | T | 0.022  | -0.0197 | 0.0147 | 0.1803   | -0.0655 | 0.0295 | 0.02667  | 0.0026  | 0.0302 | 0.9318   | 0.0119  | 0.0264 | 0.6529   |      |
| rs11191560 | <i>NT5C2</i>       | BMI     | C | 0.031  | -0.011  | 0.0249 | 0.6573   | -0.1477 | 0.0522 | 0.004677 | -0.0195 | 0.0509 | 0.7011   | 0.0212  | 0.0442 | 0.6314   |      |
| rs11583200 | <i>ELAVL4</i>      | BMI     | C | 0.018  | 0.0051  | 0.0147 | 0.7271   | 0.0758  | 0.0296 | 0.01051  | -0.023  | 0.0304 | 0.4497   | -0.0028 | 0.0267 | 0.9176   |      |
| rs1167827  | <i>HIP1</i>        | BMI     | G | 0.02   | 0.0248  | 0.0147 | 0.09193  | 0.0289  | 0.0298 | 0.3316   | 0.0582  | 0.0303 | 0.05518  | -0.0692 | 0.0265 | 0.008975 | Yes* |
| rs11688816 | <i>EHBP1</i>       | BMI     | G | 0.017  | 0.0149  | 0.0143 | 0.2976   | 0.0136  | 0.0296 | 0.646    | 0.0224  | 0.0294 | 0.4457   | 0.0386  | 0.0261 | 0.1382   |      |
| rs11727676 | <i>HHIP</i>        | BMI     | T | 0.036  | -0.0219 | 0.027  | 0.4176   | -0.1187 | 0.058  | 0.04062  | -0.0215 | 0.0543 | 0.6921   | -0.0272 | 0.0491 | 0.5793   |      |
| rs11847697 | <i>PRKD1</i>       | BMI     | T | 0.049  | 0.0468  | 0.0354 | 0.1865   | 0.0682  | 0.0731 | 0.3505   | 0.1964  | 0.0683 | 0.004017 | 0.0189  | 0.0654 | 0.7722   |      |
| rs12016871 | <i>MTIF3</i>       | BMI     | T | 0.030  | 0.1162  | 0.1087 | 0.2851   | -0.0185 | 0.3345 | 0.9559   | 0.1811  | 0.1975 | 0.3592   | -0.3912 | 0.3266 | 0.231    |      |
| rs12286929 | <i>CADM1</i>       | BMI     | G | 0.022  | 0.0083  | 0.0143 | 0.5637   | 0.0122  | 0.0292 | 0.6751   | 0.0667  | 0.0296 | 0.02403  | 0.0008  | 0.0261 | 0.9764   |      |
| rs12401738 | <i>FUBP1</i>       | BMI     | A | 0.021  | 0.0204  | 0.0151 | 0.175    | 0.0316  | 0.0307 | 0.3037   | 0.0517  | 0.031  | 0.09509  | 0.0056  | 0.0275 | 0.8381   |      |
| rs12429545 | <i>OLFM4</i>       | BMI     | A | 0.033  | 0.0396  | 0.0215 | 0.06499  | 0.0513  | 0.0434 | 0.2375   | 0.0594  | 0.0439 | 0.1762   | 0.0391  | 0.0388 | 0.3129   |      |
| rs12446632 | <i>GPRC5B</i>      | BMI     | G | 0.040  | -0.0136 | 0.0203 | 0.5022   | -0.0404 | 0.0404 | 0.3173   | 0.0036  | 0.0414 | 0.9312   | 0.0244  | 0.0368 | 0.5069   |      |
| rs12566985 | <i>FPGT-TNNI3K</i> | BMI     | G | 0.024  | -0.0026 | 0.0144 | 0.8545   | -0.0263 | 0.0293 | 0.3693   | -0.0218 | 0.0297 | 0.4632   | -0.0416 | 0.0263 | 0.1131   |      |
| rs12885454 | <i>PRKD1</i>       | BMI     | C | 0.021  | 0.019   | 0.0151 | 0.2088   | -0.0101 | 0.0306 | 0.7425   | 0.0268  | 0.031  | 0.3875   | 0.0297  | 0.0275 | 0.2799   |      |

|            |                 |     |   |       |         |        |          |         |        |          |         |        |          |         |        |         |      |
|------------|-----------------|-----|---|-------|---------|--------|----------|---------|--------|----------|---------|--------|----------|---------|--------|---------|------|
| rs12940622 | <i>RPTOR</i>    | BMI | G | 0.018 | 0.0002  | 0.0144 | 0.9874   | 0.0213  | 0.0292 | 0.4652   | -0.0014 | 0.0293 | 0.9625   | -0.0273 | 0.0259 | 0.2928  |      |
| rs13021737 | <i>TMEM18</i>   | BMI | G | 0.060 | 0.0065  | 0.0191 | 0.734    | 0.0606  | 0.0395 | 0.1247   | -0.0013 | 0.0392 | 0.9737   | -0.0271 | 0.0345 | 0.4313  |      |
| rs13078960 | <i>CADM2</i>    | BMI | G | 0.030 | -0.0115 | 0.0179 | 0.5216   | 0.0359  | 0.0362 | 0.3214   | -0.0167 | 0.0368 | 0.6505   | -0.0097 | 0.0324 | 0.7639  |      |
| rs13107325 | <i>SLC39A8</i>  | BMI | T | 0.048 | 0.0134  | 0.0271 | 0.6211   | 0.0465  | 0.0549 | 0.3964   | 0.0208  | 0.0556 | 0.7092   | -0.0078 | 0.0497 | 0.8746  | Yes† |
| rs13191362 | <i>PARK2</i>    | BMI | A | 0.028 | -0.033  | 0.0224 | 0.1402   | -0.0076 | 0.0466 | 0.8706   | 0.0229  | 0.0465 | 0.6228   | -0.0761 | 0.0404 | 0.05966 |      |
| rs1516725  | <i>ETV5</i>     | BMI | C | 0.045 | -0.0027 | 0.0211 | 0.8992   | -0.002  | 0.0434 | 0.9629   | -0.0312 | 0.0431 | 0.4692   | 0.0541  | 0.0391 | 0.1666  |      |
| rs1528435  | <i>UBE2E3</i>   | BMI | T | 0.018 | -0.0126 | 0.0148 | 0.3964   | 0.0039  | 0.0301 | 0.896    | -0.0238 | 0.0304 | 0.4329   | -0.0609 | 0.0267 | 0.02243 |      |
| rs1558902  | <i>FTO</i>      | BMI | A | 0.082 | -0.0004 | 0.0146 | 0.9775   | 0.0283  | 0.0296 | 0.3391   | -0.0095 | 0.0298 | 0.7505   | 0.0051  | 0.0263 | 0.8455  | Yes† |
| rs16851483 | <i>RASA2</i>    | BMI | T | 0.048 | 0.0389  | 0.0284 | 0.1712   | 0.0037  | 0.0586 | 0.95     | 0.0835  | 0.0572 | 0.1441   | 0.1017  | 0.0509 | 0.04584 |      |
| rs16951275 | <i>MAP2K5</i>   | BMI | T | 0.031 | 0.023   | 0.0173 | 0.1821   | -0.0297 | 0.0349 | 0.3951   | 0.1095  | 0.0362 | 0.002503 | 0.0177  | 0.0316 | 0.5747  |      |
| rs17001654 | <i>SCARB2</i>   | BMI | G | 0.031 | -0.0218 | 0.0201 | 0.2787   | -0.0289 | 0.0412 | 0.484    | 0.0099  | 0.041  | 0.8098   | -0.0058 | 0.0364 | 0.8724  |      |
| rs17024393 | <i>GNAT2</i>    | BMI | C | 0.066 | 0.0395  | 0.0431 | 0.3593   | 0.0613  | 0.0871 | 0.4818   | 0.1168  | 0.0894 | 0.1912   | -0.0022 | 0.0766 | 0.9775  |      |
| rs17094222 | <i>HIF1AN</i>   | BMI | C | 0.025 | 0.0095  | 0.0178 | 0.5928   | -0.0293 | 0.0362 | 0.4184   | -0.0029 | 0.0367 | 0.9376   | 0.0262  | 0.0322 | 0.4164  |      |
| rs17405819 | <i>HNFB4G</i>   | BMI | T | 0.022 | -0.007  | 0.0157 | 0.6549   | -0.0311 | 0.0316 | 0.3248   | -0.0173 | 0.032  | 0.5878   | -0.027  | 0.0281 | 0.3366  |      |
| rs17724992 | <i>PGPEP1</i>   | BMI | A | 0.019 | 0.0369  | 0.0164 | 0.02423  | 0.0783  | 0.0335 | 0.01938  | 0.0544  | 0.0336 | 0.1056   | 0.0375  | 0.0297 | 0.2072  |      |
| rs1808579  | <i>C18orf8</i>  | BMI | C | 0.017 | 0.0116  | 0.0144 | 0.4189   | 0.0308  | 0.0292 | 0.291    | -0.018  | 0.0294 | 0.5405   | 0.0343  | 0.0261 | 0.1883  |      |
| rs1928295  | <i>TLR4</i>     | BMI | T | 0.019 | -0.0175 | 0.0144 | 0.2258   | -0.0075 | 0.0295 | 0.7979   | -0.0424 | 0.0296 | 0.1528   | 0.0237  | 0.0262 | 0.3667  |      |
| rs2033529  | <i>TDRG1</i>    | BMI | G | 0.019 | -0.012  | 0.0158 | 0.4466   | 0.0238  | 0.0319 | 0.4562   | -0.0241 | 0.0325 | 0.4572   | -0.002  | 0.0286 | 0.9442  |      |
| rs2033732  | <i>RALYL</i>    | BMI | C | 0.019 | -0.0023 | 0.0168 | 0.8908   | -0.0272 | 0.034  | 0.4234   | -0.0307 | 0.0342 | 0.3687   | 0.0659  | 0.031  | 0.03338 |      |
| rs205262   | <i>C6orf106</i> | BMI | G | 0.022 | 0.0315  | 0.0159 | 0.04732  | 0.0859  | 0.0322 | 0.007584 | -0.002  | 0.0326 | 0.9517   | 0.0228  | 0.0289 | 0.4288  | Yes† |
| rs2075650  | <i>TOMM40</i>   | BMI | A | 0.026 | 0.0089  | 0.0208 | 0.6673   | -0.0469 | 0.0417 | 0.2607   | 0.0082  | 0.0436 | 0.8514   | 0.0107  | 0.038  | 0.7784  | Yes† |
| rs2112347  | <i>POC5</i>     | BMI | T | 0.026 | 0.0007  | 0.0162 | 0.967    | 0.0114  | 0.0325 | 0.7255   | -0.056  | 0.0334 | 0.09321  | -0.0005 | 0.0294 | 0.9856  | Yes† |
| rs2121279  | <i>LRP1B</i>    | BMI | T | 0.025 | -0.018  | 0.0217 | 0.4052   | -0.0381 | 0.0444 | 0.3908   | -0.0123 | 0.0452 | 0.7865   | -0.0095 | 0.039  | 0.8075  |      |
| rs2176598  | <i>HSD17B12</i> | BMI | T | 0.020 | 0.0541  | 0.0166 | 0.001141 | 0.0639  | 0.034  | 0.05981  | 0.0892  | 0.0339 | 0.008447 | 0.0478  | 0.0302 | 0.1135  |      |
| rs2207139  | <i>TFAP2B</i>   | BMI | G | 0.045 | 0.0346  | 0.0189 | 0.06698  | 0.0405  | 0.0379 | 0.2856   | 0.0205  | 0.0387 | 0.5973   | 0.0161  | 0.0341 | 0.6377  |      |
| rs2245368  | <i>PMS2L11</i>  | BMI | C | 0.032 | -0.0245 | 0.0253 | 0.3324   | -0.0147 | 0.0531 | 0.7815   | -0.0679 | 0.0513 | 0.186    | -0.0045 | 0.0436 | 0.9173  |      |
| rs2287019  | <i>QPCTL</i>    | BMI | C | 0.036 | -0.0052 | 0.0184 | 0.7794   | 0.0249  | 0.0383 | 0.5151   | -0.0414 | 0.0374 | 0.268    | 0.0064  | 0.0338 | 0.8498  | Yes† |
| rs2365389  | <i>FHIT</i>     | BMI | C | 0.020 | 0.0091  | 0.0146 | 0.533    | 0.0104  | 0.0297 | 0.7264   | 0.0023  | 0.03   | 0.9387   | 0.0045  | 0.0265 | 0.8647  |      |
| rs2650492  | <i>SBK1</i>     | BMI | A | 0.021 | 0.0081  | 0.0162 | 0.6167   | 0.0386  | 0.032  | 0.2283   | -0.0165 | 0.0328 | 0.6161   | 0.0012  | 0.0289 | 0.9658  |      |
| rs2820292  | <i>NAV1</i>     | BMI | C | 0.020 | 0.0068  | 0.0144 | 0.6396   | 0.0108  | 0.0293 | 0.7116   | 0.0055  | 0.0296 | 0.8523   | 0.0056  | 0.026  | 0.8287  |      |
| rs29941    | <i>KCTD15</i>   | BMI | G | 0.018 | 0.0182  | 0.0156 | 0.2428   | 0.0562  | 0.0329 | 0.08803  | 0.0124  | 0.0322 | 0.6999   | 0.0267  | 0.0289 | 0.3562  |      |
| rs3101336  | <i>NEGR1</i>    | BMI | C | 0.033 | -0.011  | 0.0147 | 0.4543   | -0.0238 | 0.0299 | 0.4261   | -0.0701 | 0.0302 | 0.02     | 0       | 0.0268 | 0.9995  |      |
| rs3736485  | <i>DMXL2</i>    | BMI | A | 0.018 | -0.0055 | 0.0145 | 0.7064   | -0.026  | 0.0295 | 0.3779   | 0.0171  | 0.0297 | 0.564    | 0.0406  | 0.0262 | 0.1221  |      |

|           |                 |     |   |       |         |        |         |         |        |          |         |        |         |         |        |         |      |
|-----------|-----------------|-----|---|-------|---------|--------|---------|---------|--------|----------|---------|--------|---------|---------|--------|---------|------|
| rs3810291 | <i>ZC3H4</i>    | BMI | A | 0.028 | 0.0077  | 0.0164 | 0.6405  | 0.0196  | 0.0346 | 0.5705   | -0.0104 | 0.0336 | 0.7582  | -0.0039 | 0.0303 | 0.8972  |      |
| rs3817334 | <i>MTCH2</i>    | BMI | T | 0.026 | 0.0064  | 0.0146 | 0.6629  | 0.0111  | 0.0296 | 0.7076   | 0.0466  | 0.0297 | 0.1166  | -0.0007 | 0.0264 | 0.978   |      |
| rs3849570 | <i>GBE1</i>     | BMI | A | 0.019 | 0.0193  | 0.0154 | 0.2098  | 0.0459  | 0.0311 | 0.1392   | 0.0465  | 0.0315 | 0.1393  | -0.0045 | 0.0278 | 0.8708  |      |
| rs3888190 | <i>ATP2A1</i>   | BMI | A | 0.031 | 0.0072  | 0.0147 | 0.6256  | 0.0229  | 0.0299 | 0.4429   | -0.011  | 0.0302 | 0.7149  | 0.0298  | 0.0266 | 0.2628  |      |
| rs4256980 | <i>TRIM66</i>   | BMI | G | 0.021 | -0.0171 | 0.0149 | 0.2528  | 0.0503  | 0.0305 | 0.09932  | -0.0375 | 0.0306 | 0.2208  | -0.0319 | 0.027  | 0.2373  |      |
| rs4740619 | <i>C9orf93</i>  | BMI | T | 0.018 | 0.011   | 0.0144 | 0.4457  | 0.0151  | 0.0295 | 0.6096   | -0.0103 | 0.0296 | 0.7281  | -0.0123 | 0.0263 | 0.6396  |      |
| rs543874  | <i>SEC16B</i>   | BMI | G | 0.048 | -0.0087 | 0.0183 | 0.634   | 0.0145  | 0.037  | 0.6948   | -0.0394 | 0.0378 | 0.2969  | 0.0141  | 0.0332 | 0.6706  |      |
| rs6477694 | <i>EPB41L4B</i> | BMI | C | 0.017 | 0.0242  | 0.015  | 0.1076  | 0.0726  | 0.0303 | 0.01666  | -0.0041 | 0.0309 | 0.8933  | 0.0645  | 0.0272 | 0.01751 |      |
| rs6567160 | <i>MC4R</i>     | BMI | C | 0.056 | -0.0075 | 0.017  | 0.6592  | -0.0223 | 0.0349 | 0.5221   | -0.0408 | 0.0356 | 0.252   | 0.0274  | 0.0308 | 0.3728  | Yes† |
| rs657452  | <i>AGBL4</i>    | BMI | A | 0.023 | 0.0145  | 0.0148 | 0.3263  | 0.0472  | 0.0297 | 0.1123   | -0.0199 | 0.0304 | 0.5142  | 0.0241  | 0.0267 | 0.3672  |      |
| rs6804842 | <i>RARB</i>     | BMI | G | 0.019 | -0.0108 | 0.0144 | 0.4543  | -0.0399 | 0.0293 | 0.1725   | -0.047  | 0.0297 | 0.1132  | -0.0121 | 0.0262 | 0.6447  |      |
| rs7138803 | <i>BCDIN3D</i>  | BMI | A | 0.032 | 0.0228  | 0.0148 | 0.1223  | -0.0085 | 0.0301 | 0.7766   | 0.0355  | 0.0303 | 0.2401  | 0.0638  | 0.0267 | 0.017   |      |
| rs7141420 | <i>NRXN3</i>    | BMI | T | 0.024 | 0.0324  | 0.0143 | 0.02339 | -0.0073 | 0.029  | 0.8023   | 0.0362  | 0.0294 | 0.2184  | 0.0558  | 0.0259 | 0.03099 |      |
| rs7243357 | <i>GRP</i>      | BMI | T | 0.022 | -0.0093 | 0.0191 | 0.6257  | -0.0568 | 0.0388 | 0.1435   | -0.0065 | 0.0393 | 0.8683  | 0.0346  | 0.0351 | 0.3252  |      |
| rs758747  | <i>NLRC3</i>    | BMI | T | 0.023 | -0.01   | 0.0165 | 0.5441  | -0.0273 | 0.0335 | 0.4144   | 0.0099  | 0.0338 | 0.7691  | -0.0248 | 0.0301 | 0.4094  |      |
| rs7599312 | <i>ERBB4</i>    | BMI | G | 0.022 | -0.0365 | 0.0161 | 0.02344 | -0.0283 | 0.0328 | 0.3883   | -0.0576 | 0.033  | 0.08047 | -0.0661 | 0.0292 | 0.02346 |      |
| rs7899106 | <i>GRID1</i>    | BMI | G | 0.040 | 0       | 0.0342 | 0.9996  | -0.0501 | 0.0719 | 0.4863   | 0.1066  | 0.0687 | 0.1208  | -0.0322 | 0.0622 | 0.6048  |      |
| rs7903146 | <i>TCF7L2</i>   | BMI | C | 0.023 | -0.0427 | 0.018  | 0.01736 | -0.1069 | 0.0346 | 0.001981 | -0.0621 | 0.0374 | 0.09669 | -0.0323 | 0.0313 | 0.3022  | Yes* |
| rs9400239 | <i>FOXO3</i>    | BMI | C | 0.019 | -0.0232 | 0.0154 | 0.1325  | -0.0074 | 0.0313 | 0.8122   | -0.0487 | 0.0314 | 0.1209  | -0.0216 | 0.028  | 0.4407  |      |
| rs9925964 | <i>KAT8</i>     | BMI | A | 0.019 | -0.0191 | 0.0151 | 0.2071  | -0.0097 | 0.0313 | 0.7559   | -0.0327 | 0.0309 | 0.2894  | -0.0398 | 0.0276 | 0.1491  | Yes† |

BMI, body mass index; EA, effect allele; SA, sensitivity analysis; SNP, single nucleotide polymorphism; T2D; type 2 diabetes.

\*Excluded in a sensitivity analysis in which loci that overlapped between the four metabolic traits were removed.

†Excluded in a sensitivity analysis in which SNPs associated with blood lipids (low-density lipoprotein cholesterol, high-density lipoprotein cholesterol, total cholesterol, or triglycerides) at genome-wide significance were removed.

‡Adjusted for body mass index.

§The *BDNF* locus has been identified to be associated with smoking (PMID: 20418890). The SNP in this locus was excluded in a sensitivity analysis.

**Table e-2. Mendelian randomization estimates of the associations between each genetically predicted risk factor and ischemic stroke and its subtypes in analyses using the inverse-variance weighted, weighted median, and MR-Egger regression methods**

|                                   | All ischemic strokes<br>(18,476 cases/37,296 controls) |                      | Large artery stroke<br>(2947 cases/35,498 controls) |                      | Small vessel stroke<br>(2757 cases/35,498 controls) |                      | Cardioembolic stroke<br>(3860 cases/35,498 controls) |         |
|-----------------------------------|--------------------------------------------------------|----------------------|-----------------------------------------------------|----------------------|-----------------------------------------------------|----------------------|------------------------------------------------------|---------|
|                                   | OR (95% CI)*                                           | p Value              | OR (95% CI)*                                        | p Value              | OR (95% CI)*                                        | p Value              | OR (95% CI)*                                         | p Value |
| <b>Inverse-variance weighted</b>  |                                                        |                      |                                                     |                      |                                                     |                      |                                                      |         |
| Type 2 diabetes                   | 1.12 (1.07–1.17)                                       | 3.0x10 <sup>-6</sup> | 1.28 (1.16–1.40)                                    | 3.3x10 <sup>-7</sup> | 1.21 (1.10–1.33)                                    | 8.9x10 <sup>-5</sup> | 1.06 (0.97–1.15)                                     | 0.17    |
| Fasting glucose                   | 1.12 (0.98–1.28)                                       | 0.09                 | 1.42 (1.08–1.85)                                    | 0.01                 | 1.09 (0.83–1.43)                                    | 0.54                 | 1.01 (0.80–1.29)                                     | 0.91    |
| Fasting insulin                   | 1.03 (0.78–1.37)                                       | 0.82                 | 1.42 (0.80–2.50)                                    | 0.23                 | 1.15 (0.65–2.02)                                    | 0.64                 | 0.83 (0.50–1.38)                                     | 0.48    |
| Body mass index                   | 1.11 (0.98–1.27)                                       | 0.11                 | 1.25 (0.96–1.63)                                    | 0.10                 | 1.00 (0.76–1.30)                                    | 0.99                 | 1.16 (0.91–1.47)                                     | 0.22    |
| <b>Weighted median</b>            |                                                        |                      |                                                     |                      |                                                     |                      |                                                      |         |
| Type 2 diabetes                   | 1.13 (1.04–1.22)                                       | 0.002                | 1.34 (1.16–1.56)                                    | 1.1x10 <sup>-4</sup> | 1.19 (1.01–1.40)                                    | 0.04                 | 1.09 (0.95–1.25)                                     | 0.21    |
| Fasting glucose                   | 0.92 (0.74–1.13)                                       | 0.41                 | 1.52 (0.94–2.46)                                    | 0.09                 | 0.87 (0.57–1.33)                                    | 0.51                 | 0.90 (0.64–1.26)                                     | 0.53    |
| Fasting insulin                   | 0.98 (0.64–1.50)                                       | 0.93                 | 1.85 (0.76–4.51)                                    | 0.18                 | 1.16 (0.55–2.61)                                    | 0.73                 | 0.79 (0.38–1.64)                                     | 0.52    |
| Body mass index                   | 1.01 (0.81–1.24)                                       | 0.99                 | 1.40 (0.89–2.21)                                    | 0.14                 | 0.89 (0.55–1.44)                                    | 0.64                 | 1.11 (0.74–1.66)                                     | 0.62    |
| <b>Penalized weighted median†</b> |                                                        |                      |                                                     |                      |                                                     |                      |                                                      |         |
| Type 2 diabetes                   | 1.12 (1.04–1.21)                                       | 0.003                | 1.31 (1.13–1.52)                                    | 2.8x10 <sup>-4</sup> | 1.19 (1.01–1.40)                                    | 0.04                 | 1.08 (0.95–1.24)                                     | 0.25    |
| Fasting glucose                   | 0.92 (0.74–1.13)                                       | 0.41                 | 1.89 (1.21–2.97)                                    | 0.005                | 0.87 (0.57–1.32)                                    | 0.50                 | 0.89 (0.64–1.25)                                     | 0.52    |
| Fasting insulin                   | 0.98 (0.64–1.50)                                       | 0.94                 | 2.01 (0.82–4.95)                                    | 0.13                 | 1.16 (0.51–2.61)                                    | 0.72                 | 0.84 (0.41–1.75)                                     | 0.65    |
| Body mass index                   | 1.01 (0.81–1.24)                                       | 0.99                 | 1.41 (0.89–2.22)                                    | 0.15                 | 0.89 (0.55–1.44)                                    | 0.64                 | 1.12 (0.75–1.68)                                     | 0.57    |
| <b>MR-Egger regression‡</b>       |                                                        |                      |                                                     |                      |                                                     |                      |                                                      |         |
| Type 2 diabetes                   | 1.07 (0.94–1.19)                                       | 0.30                 | 1.25 (0.98–1.53)                                    | 0.08                 | 1.12 (0.88–1.40)                                    | 0.33                 | 1.01 (0.83–1.24)                                     | 0.90    |
| Fasting glucose                   | 0.80 (0.64–1.02)                                       | 0.13                 | 1.15 (0.70–1.87)                                    | 0.66                 | 0.67 (0.42–1.11)                                    | 0.17                 | 0.80 (0.52–1.24)                                     | 0.32    |
| Fasting insulin§                  | –                                                      | –                    | –                                                   | –                    | –                                                   | –                    | –                                                    | –       |
| Body mass index                   | 1.05 (0.75–1.44)                                       | 0.82                 | 1.03 (0.53–1.98)                                    | 0.96                 | 1.22 (0.61–2.33)                                    | 0.63                 | 1.15 (0.64–2.03)                                     | 0.68    |

\*The scaling of the odds ratios was one unit higher log-odds for type 2 diabetes and one standard deviation increase of fasting glucose, fasting insulin, and body mass index.

†A weighted median approach that downweights the contribution to the analysis of genetic variants with heterogeneous ratio estimates.

‡Confidence intervals were estimated using bootstrapping.

§MR-Egger regression estimates could not be identified because the SNPs had similar magnitudes of association with fasting insulin.



**Table e-3. Mendelian randomization estimates (inverse-variance weighted method) of the associations between each genetically predicted risk factor and ischemic stroke and its subtypes in sensitivity analyses excluding pleiotropic loci**

| Sensitivity analysis excluding                            | All ischemic strokes<br>(18 476 cases/37,296 controls) |                      | Large artery stroke<br>(2947 cases/35,498 controls) |                      | Small vessel stroke<br>(2757 cases/35,498 controls) |                      | Cardioembolic stroke<br>(3860 cases/35,498 controls) |                |
|-----------------------------------------------------------|--------------------------------------------------------|----------------------|-----------------------------------------------------|----------------------|-----------------------------------------------------|----------------------|------------------------------------------------------|----------------|
|                                                           | OR (95% CI)*                                           | <i>p</i> Value       | OR (95% CI)*                                        | <i>p</i> Value       | OR (95% CI)*                                        | <i>p</i> Value       | OR (95% CI)*                                         | <i>p</i> Value |
| <b><i>TCF7L2</i> locus†</b>                               |                                                        |                      |                                                     |                      |                                                     |                      |                                                      |                |
| Type 2 diabetes                                           | 1.11 (1.06-1.17)                                       | 5.4x10 <sup>-5</sup> | 1.25 (1.13-1.39)                                    | 3.3x10 <sup>-5</sup> | 1.21 (1.09-1.35)                                    | 3.4x10 <sup>-4</sup> | 1.05 (0.95-1.15)                                     | 0.32           |
| Fasting glucose                                           | 1.10 (0.96-1.26)                                       | 0.17                 | 1.36 (1.03-1.78)                                    | 0.03                 | 1.05 (0.80-1.38)                                    | 0.74                 | 1.00 (0.79-1.28)                                     | 0.97           |
| Fasting insulin                                           | 1.13 (0.85-1.50)                                       | 0.41                 | 1.84 (1.03-3.30)                                    | 0.04                 | 1.30 (0.72-2.33)                                    | 0.38                 | 0.88 (0.53-1.48)                                     | 0.64           |
| Body mass index                                           | 1.13 (0.99-1.29)                                       | 0.07                 | 1.30 (1.00-1.70)                                    | 0.06                 | 1.02 (0.78-1.33)                                    | 0.90                 | 1.17 (0.93-1.49)                                     | 0.19           |
| <b>Loci overlapping between the four metabolic traits</b> |                                                        |                      |                                                     |                      |                                                     |                      |                                                      |                |
| Type 2 diabetes                                           | 1.11 (1.04-1.20)                                       | 0.003                | 1.32 (1.14-1.53)                                    | 2.5x10 <sup>-4</sup> | 1.23 (1.07-1.43)                                    | 0.005                | 1.05 (0.92-1.19)                                     | 0.50           |
| Fasting glucose                                           | 1.09 (0.90-1.31)                                       | 0.37                 | 1.04 (0.71-1.52)                                    | 0.84                 | 0.95 (0.65-1.40)                                    | 0.81                 | 1.05 (0.75-1.47)                                     | 0.78           |
| Fasting insulin                                           | 1.01 (0.68-1.50)                                       | 0.97                 | 2.07 (0.92-4.68)                                    | 0.08                 | 1.27 (0.56-2.89)                                    | 0.56                 | 0.81 (0.40-1.68)                                     | 0.58           |
| Body mass index                                           | 1.13 (0.99-1.30)                                       | 0.07                 | 1.33 (1.01-1.75)                                    | 0.04                 | 1.03 (0.78-1.36)                                    | 0.84                 | 1.19 (0.93-1.52)                                     | 0.16           |
| <b>Loci associated with lipids‡</b>                       |                                                        |                      |                                                     |                      |                                                     |                      |                                                      |                |
| Type 2 diabetes                                           | 1.13 (1.07-1.18)                                       | 2.3x10 <sup>-6</sup> | 1.29 (1.17-1.42)                                    | 6.0x10 <sup>-7</sup> | 1.20 (1.09-1.33)                                    | 3.0x10 <sup>-4</sup> | 1.06 (0.97-1.16)                                     | 0.17           |
| Fasting glucose                                           | 1.11 (0.97-1.28)                                       | 0.13                 | 1.41 (1.07-1.86)                                    | 0.02                 | 1.16 (0.87-1.53)                                    | 0.31                 | 0.97 (0.75-1.24)                                     | 0.81           |
| Fasting insulin                                           | 0.83 (0.57-1.23)                                       | 0.36                 | 0.67 (0.30-1.47)                                    | 0.31                 | 1.03 (0.47-2.30)                                    | 0.93                 | 0.56 (0.28-1.12)                                     | 0.10           |
| Body mass index                                           | 1.15 (0.99-1.34)                                       | 0.07                 | 1.22 (0.89-1.65)                                    | 0.21                 | 1.14 (0.84-1.55)                                    | 0.41                 | 1.17 (0.89-1.54)                                     | 0.26           |
| <b><i>BDNF</i> locus§</b>                                 |                                                        |                      |                                                     |                      |                                                     |                      |                                                      |                |
| Body mass index                                           | 1.09 (0.96-1.25)                                       | 0.19                 | 1.23 (0.94-1.60)                                    | 0.14                 | 0.98 (0.75-1.28)                                    | 0.86                 | 1.14 (0.89-1.44)                                     | 0.30           |

CI, confidence interval; OR, odds ratio.

\*The scaling of the odds ratios was one-unit higher log-odds for type 2 diabetes and one standard deviation increase of fasting glucose, fasting insulin, and body mass index.

†Excluding the *TCF7L2* locus, which is strongly associated with type 2 diabetes and also weakly with glucose, insulin, and body mass index.

‡Excluding single nucleotide polymorphisms associated with low-density lipoprotein cholesterol, high-density lipoprotein cholesterol, total cholesterol, or triglycerides at genome-wide significance level in previous genome-wide association studies (PMID: 24097068, 20686565).

§Excluding the *BDNF* locus, which has been identified to be associated with smoking (PMID: 20418890) and also with body mass index.
